# Supplementary material for: Self-assembly of water-soluble silver nanoclusters: superstructure formation and morphological evolution
Source: Royal Society of Chemistry journal article supplement (doi:10.1039/c7nr06359h), 2017-01-01
Supplement: c7nr06359h1.pdf [file c7nr06359h1.pdf]

## Supporting Information

### Self-Assembly of Water-Soluble Silver Nanoclusters: Superstructure Formation and Morphological Evolution

Jinglin Shen <sup>a</sup>, Zhi Wang <sup>a</sup>, Di Sun<sup>a\*</sup>, Guokui Liu<sup>a</sup>, Shiling Yuan <sup>a\*</sup>, Mohamedally Kurmoo <sup>c</sup>, Xia

Xin <sup>a, b\*</sup>

---

\* Author to whom correspondence should be addressed, E-mail: [xinx@sdu.edu.cn](mailto:xinx@sdu.edu.cn).

Phone: +86-531-88363597. Fax: +86-531-88361008

\* Author to whom correspondence should be addressed, E-mail: [shilingyuan@sdu.edu.cn](mailto:shilingyuan@sdu.edu.cn).

Phone: +86-531-88365896. Fax: +86-531-88564750

\* Author to whom correspondence should be addressed, E-mail: [dsun@sdu.edu.cn](mailto:dsun@sdu.edu.cn)

Phone: +86-531-88364218. Fax: +86-531-88364216

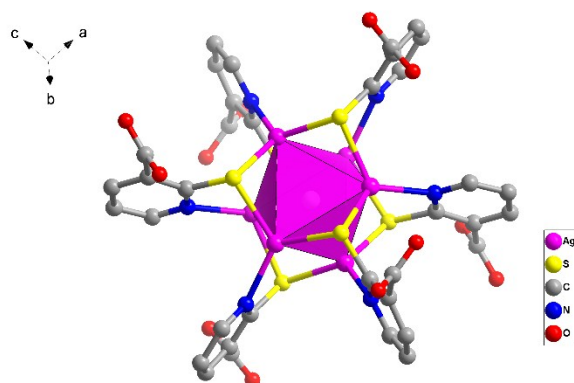

Figure S1. The molecular structure of  $\text{Ag}_6(\text{mna})_6^{6-}$ .

### Structure description of $\{(\text{NH}_4)_6[\text{Ag}_6(\text{mna})_6] \cdot 9\text{H}_2\text{O}\}$ , $\text{Ag}_6\text{-NC}$ , and its solution behavior

X-ray single-crystal diffraction data of  $\text{Ag}_6\text{-NC}$  reveals that the hexanuclear cluster crystallized in triclinic space group  $P\bar{1}$  and its asymmetric unit consists of a half of  $\text{Ag}_6\text{-NC}$  and 4.5 water molecules in the crystal lattice (Figure S1). In order to examine the solution stability of compound  $\text{Ag}_6\text{-NC}$ , we investigate the high-resolution electrospray mass spectrometry (HR-ESI-MS) of  $\text{Ag}_6\text{-NC}$  dissolved in water in the negative region (Figure S2). The HR-ESI-MS of  $\text{Ag}_6\text{-NC}$  displays two major signals centered at  $m/z = 1260.3918$  (**1a**) and  $1282.3745$  (**1b**) in the range of 1000-2000. After careful analysis, these two monovalent charged peaks could be assigned to  $[\text{Ag}_6(\text{mna})_4\text{H}]^-$  (calc.  $m/z = 1260.3904$ ) and  $[\text{Ag}_6(\text{mna})_4\text{Na}]^-$  (calc.  $m/z = 1282.3723$ ), indicating that  $\text{Ag}_6\text{-NC}$  is stable in aqueous solution.

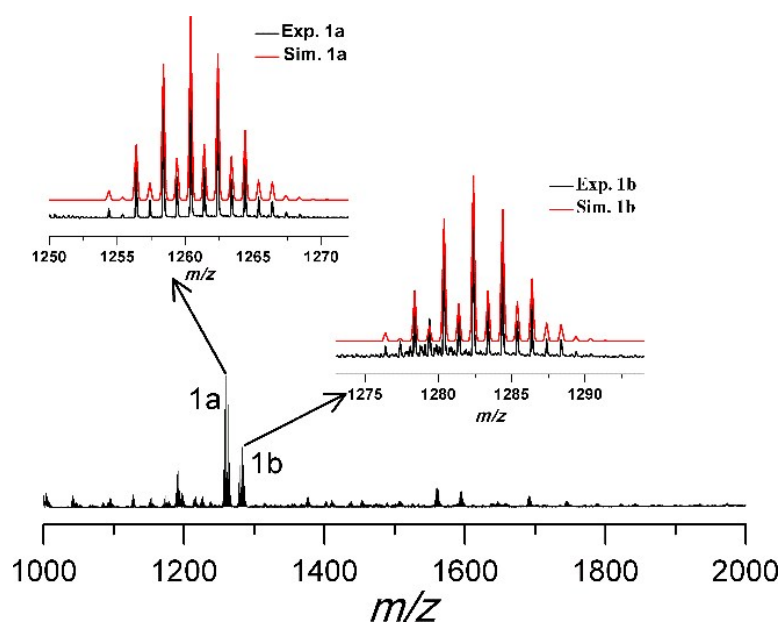

Figure S2. HR-ESI-MS in negative mode of  $\text{Ag}_6\text{-NC}$  dissolved in water. Insets: Enlarged portion of the spectra showing the experimental (black) and simulated (red) isotopic distribution patterns.

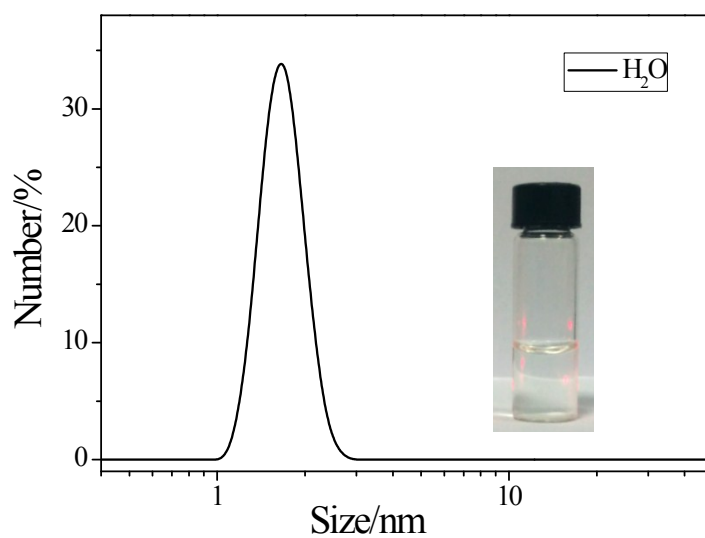

Figure S3. Dynamic laser scattering (DLS) result for  $\text{Ag}_6\text{-NC}$  in water at  $100\ \mu\text{M}$  and sample image under laser irradiation.

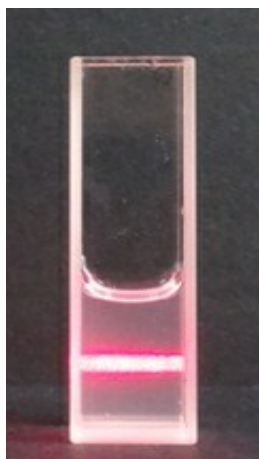

Figure S4. Tyndall phenomenon of Ag<sub>6</sub>-NC in EG at 50  $\mu$ M.

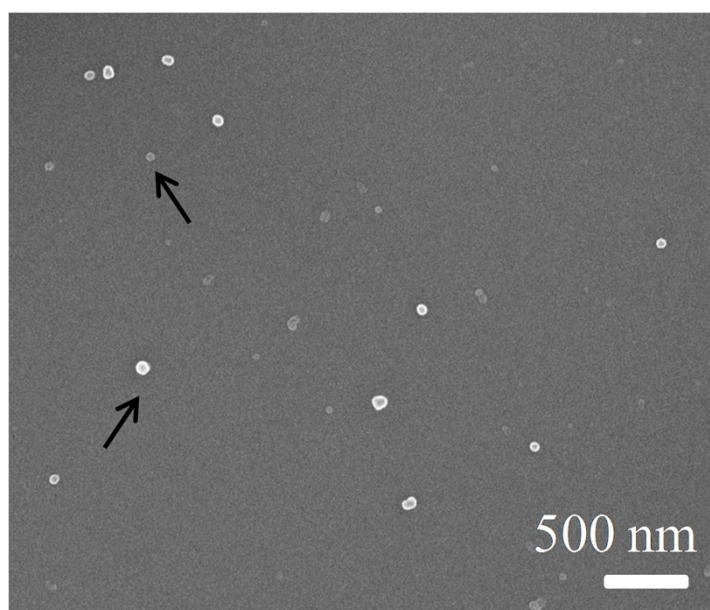

Figure S5. SEM images of the sample of Ag<sub>6</sub>-NC in EG solvent ( $c = 50\mu$ M).

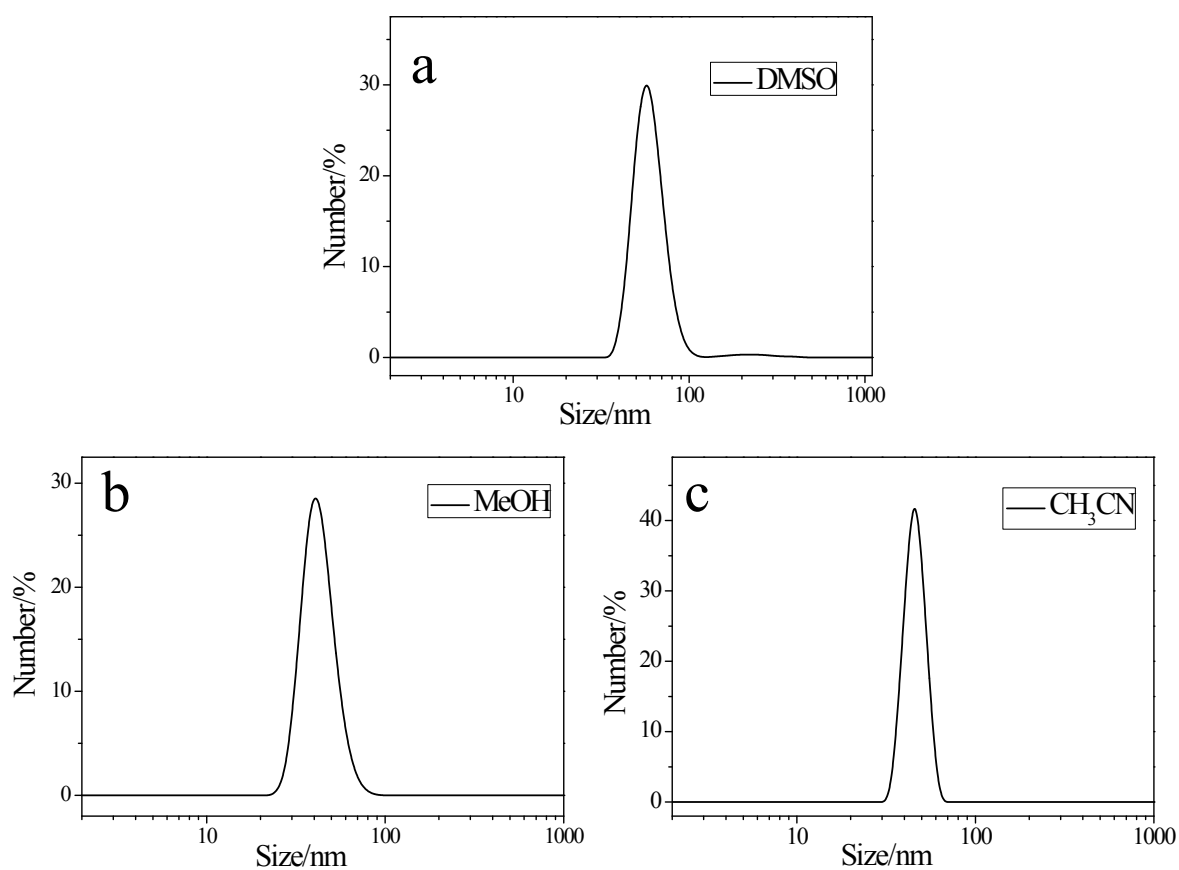

Figure S6. DLS results of  $\text{Ag}_6\text{-NC}$  in (a) DMSO, (b) MeOH and (c)  $\text{CH}_3\text{CN}$ .

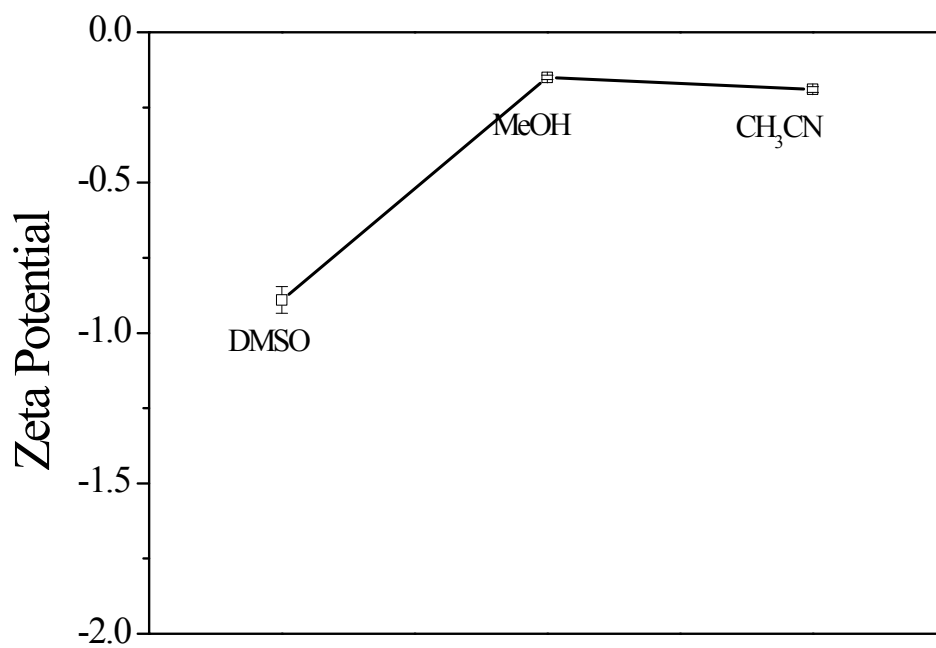

Figure S7. Zeta potential results of  $\text{Ag}_6\text{-NC}$  in (a) DMSO, (b) MeOH and (c)  $\text{CH}_3\text{CN}$ .

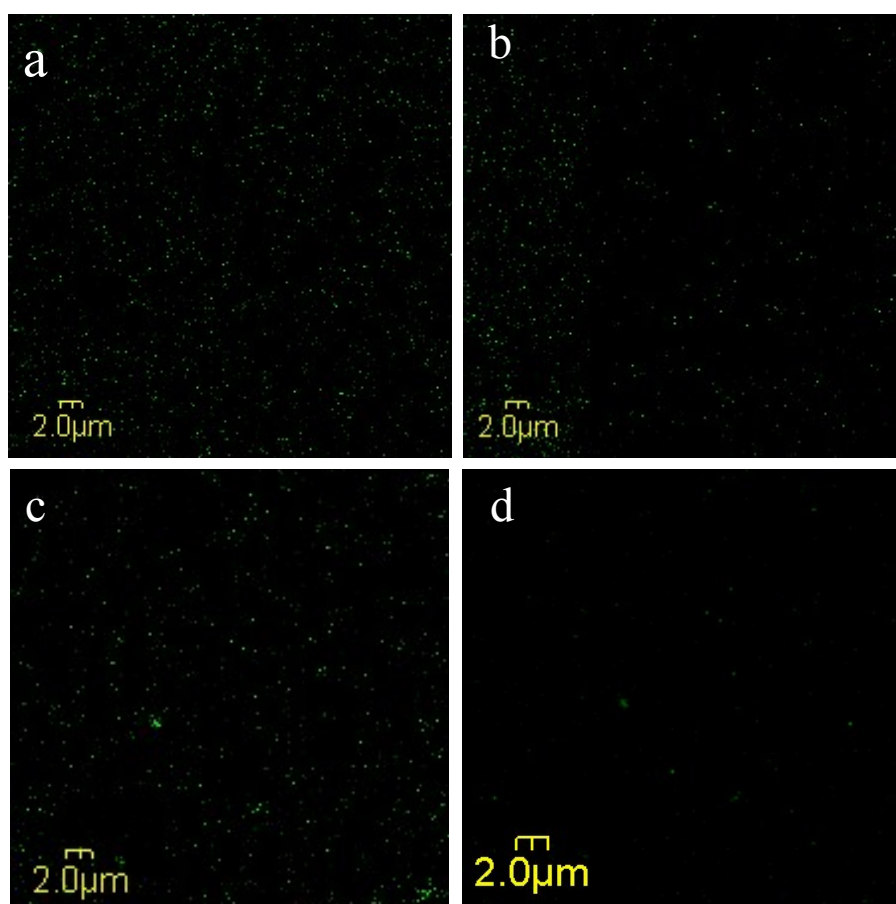

Figure S8. Confocal laser scan microscopy (CLSM) results of Ag<sub>6</sub>-NC in (a) EG, (b) DMSO, (c) MeOH and (d) CH<sub>3</sub>CN.

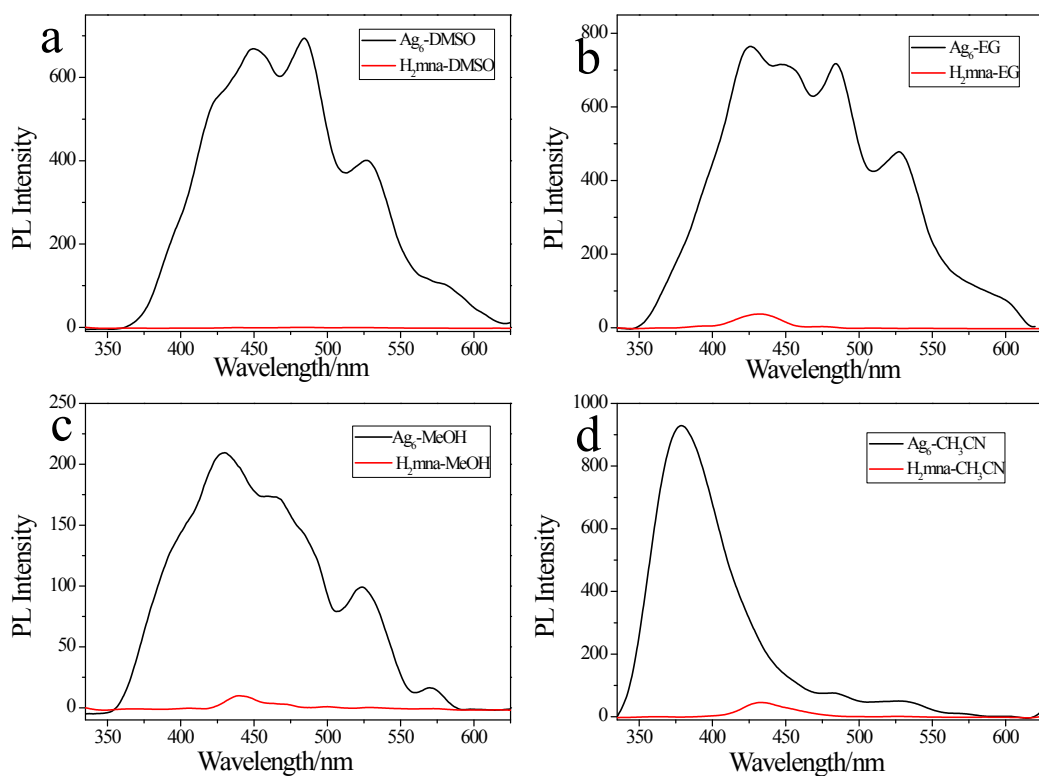

Figure S9. FL spectra of  $\text{Ag}_6\text{-NC}$  and free  $\text{H}_2\text{mna}$  in different solvents at the same concentration.

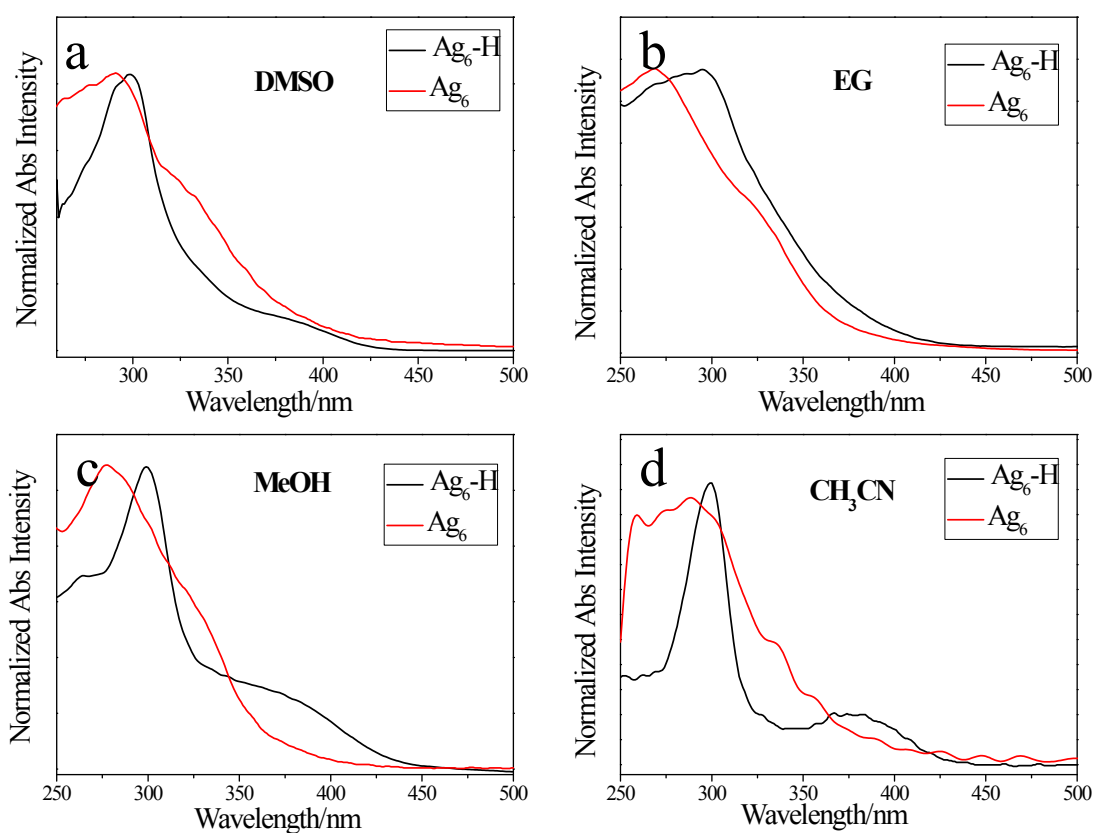

Figure S10. UV-vis spectra of  $\text{Ag}_6\text{-NC}$  and  $\text{Ag}_6\text{-H-NC}$ .

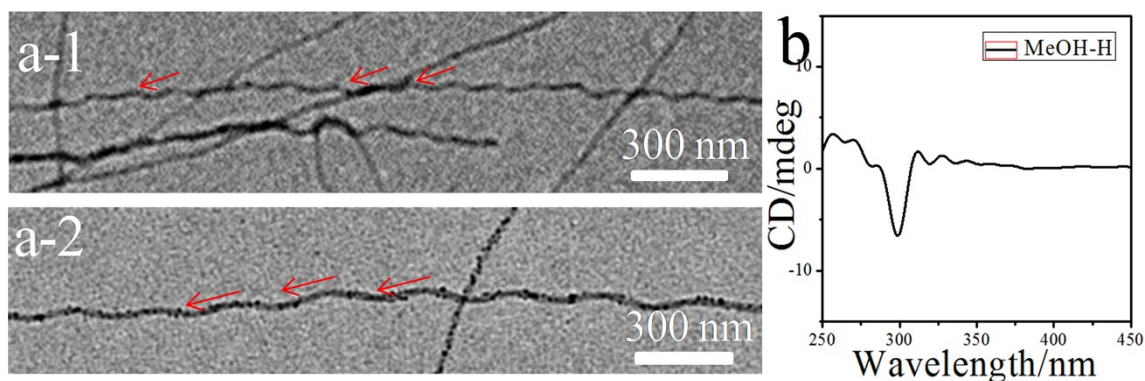

Figure S11. (a) TEM images and (b) CD spectra of Ag<sub>6</sub>-H-NC in MeOH at  $c=20\ \mu\text{M}$ .

The nanowires appear to twist in MeOH as shown in Figure S11 a. In circular dichroism (CD) spectra, an noticeable negative Cotton effect at 300 nm, suggesting that the formation of supramolecular chiral aggregates. (Figure S11 b) Helical morphology is a rather common and fascinating phenomenon in nature. Generally, helical structures are achieved by the controlled assembly of intrinsically chiral or achiral species in the presence of chiral constituents. Specially, completely achiral molecules with  $\pi$ -conjugation systems could also be capable self-assemble into helical nanostructures. The supramolecular chirality obtained from the self-assembly of achiral molecule Ag<sub>6</sub>-H-NC is expected to be solvent-bridged hydrogen bonding interaction and the  $\pi$ -conjugation structure of Ag<sub>6</sub>-H-NC. The reasons for this phenomenon are not very clear, and further studies will be made in the future.



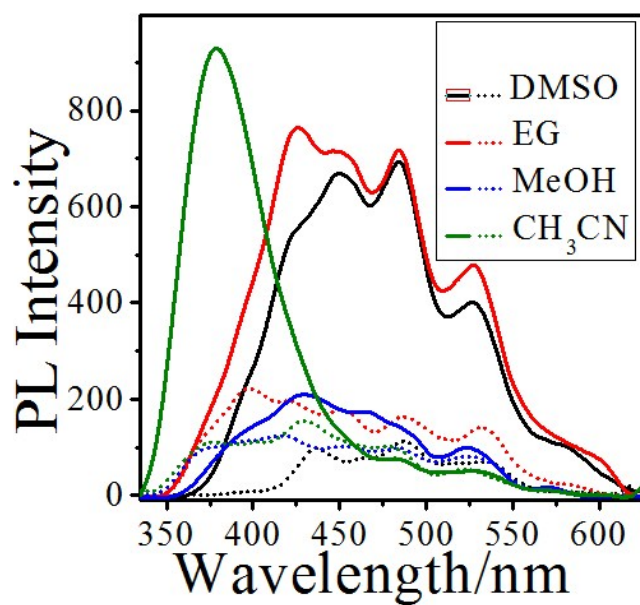

Figure S12. Fluorescence spectra of  $\text{Ag}_6\text{-NC}$  (solid line) and  $\text{Ag}_6\text{-H-NC}$  (dotted line) in different solvents with the same concentration.

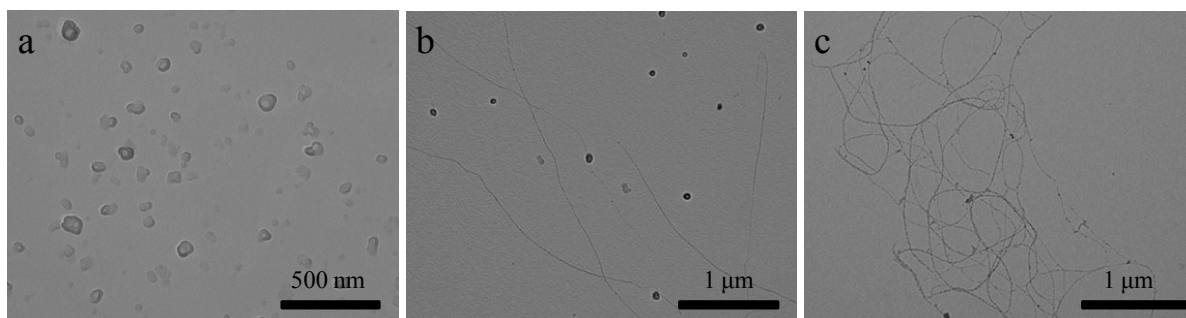

Figure S13. TEM images of  $\text{Ag}_6\text{-H-NC}$  in MeOH at different times. (a) 20 mins, (b) 10h (c) 1 day. ( $c=20\text{ }\mu\text{M}$ ).

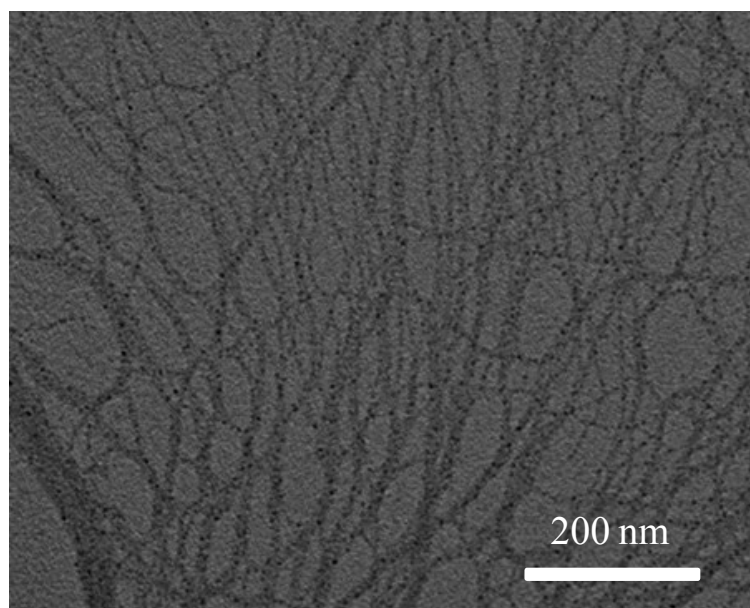

Figure S14. TEM image of Ag<sub>6</sub>H-NC in water ( $c=50\text{ }\mu\text{M}$ ).

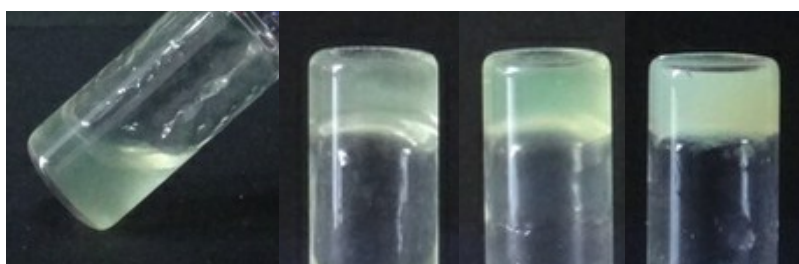

Figure S15. Phase behavior of Ag<sub>6</sub>-H-NC at different concentrations. (From left to right: 2 mM, 3 mM, 6 mM, 8 mM).

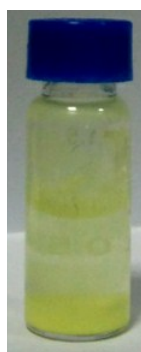

Figure S16. Phase behavior of H<sub>2</sub>mna at  $c=48\text{ mM}$ .

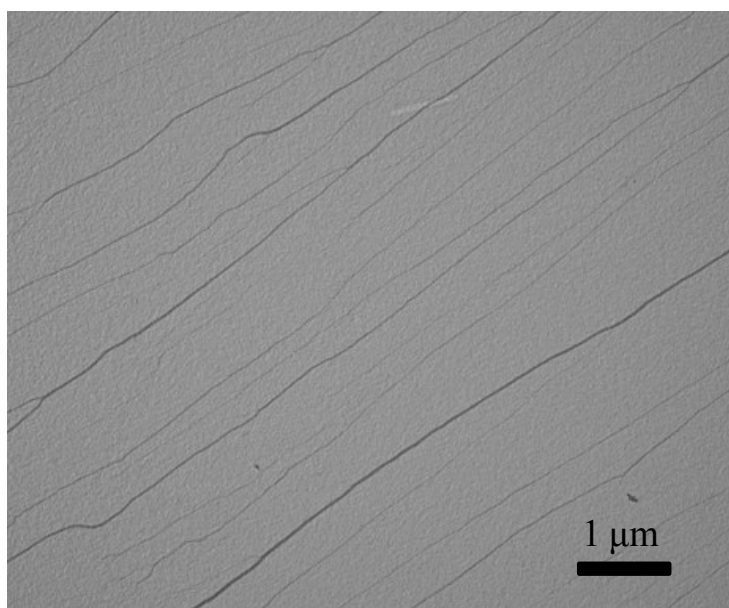

Figure S 17. TEM image of hydrogel ( $c=3$  mM).

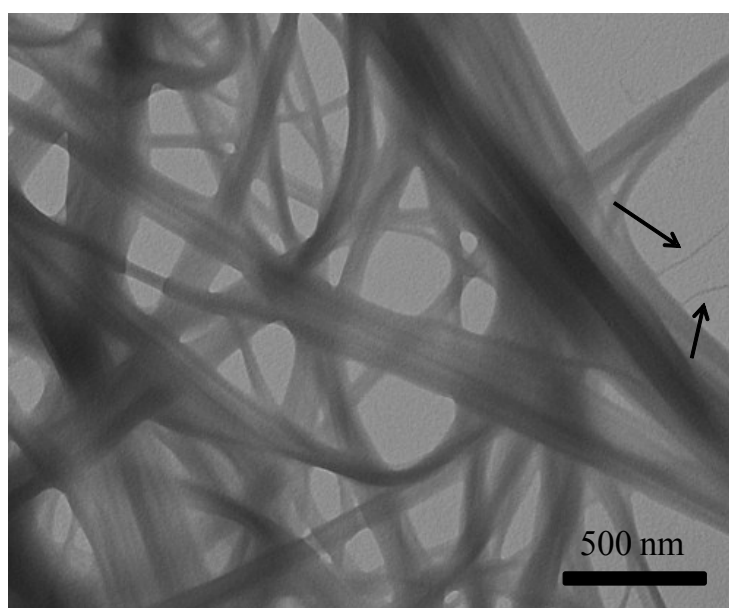

Figure S 18. TEM image of hydrogel ( $c=6$  mM).

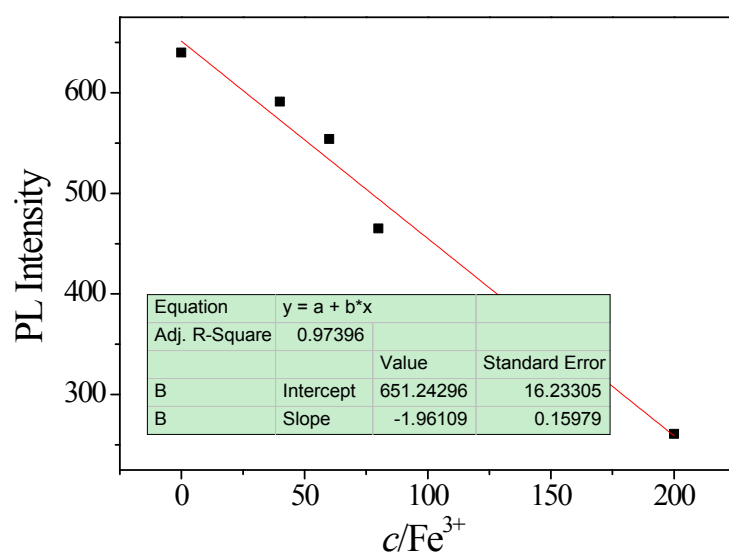

Figure S19. The linear relationship of  $I_{485}$  vs. concentration of  $\text{Fe}^{3+}$  in the range of 0–200  $\mu\text{M}$  for 50  $\mu\text{M}$   $\text{Ag}_6\text{-NC}$ .

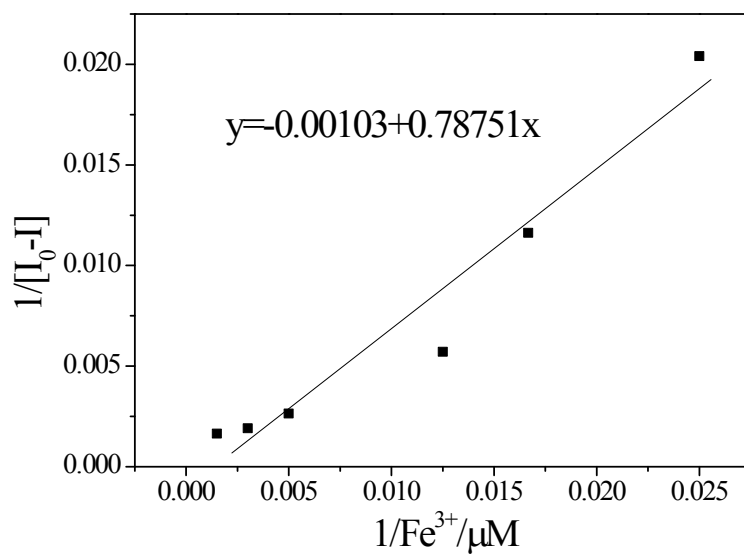

Figure S20. The linear relationship of  $1/(I-I_0)$  vs.  $1/\text{Fe}^{3+}$  for 50  $\mu\text{M}$   $\text{Ag}_6\text{-NC}$ .
